# Supplementary material for: Comparison of Different Tissue Clearing Methods for Three-Dimensional Reconstruction of Human Brain Cellular Anatomy Using Advanced Imaging Techniques
Source: Frontiers journal article supplement (doi:10.3389/fnana.2021.752234), 2021-11-11
Supplement: Data_Sheet_1.pdf [file Data_Sheet_1.pdf]

## Supplementary Material

### 1.1 Supplementary Figures

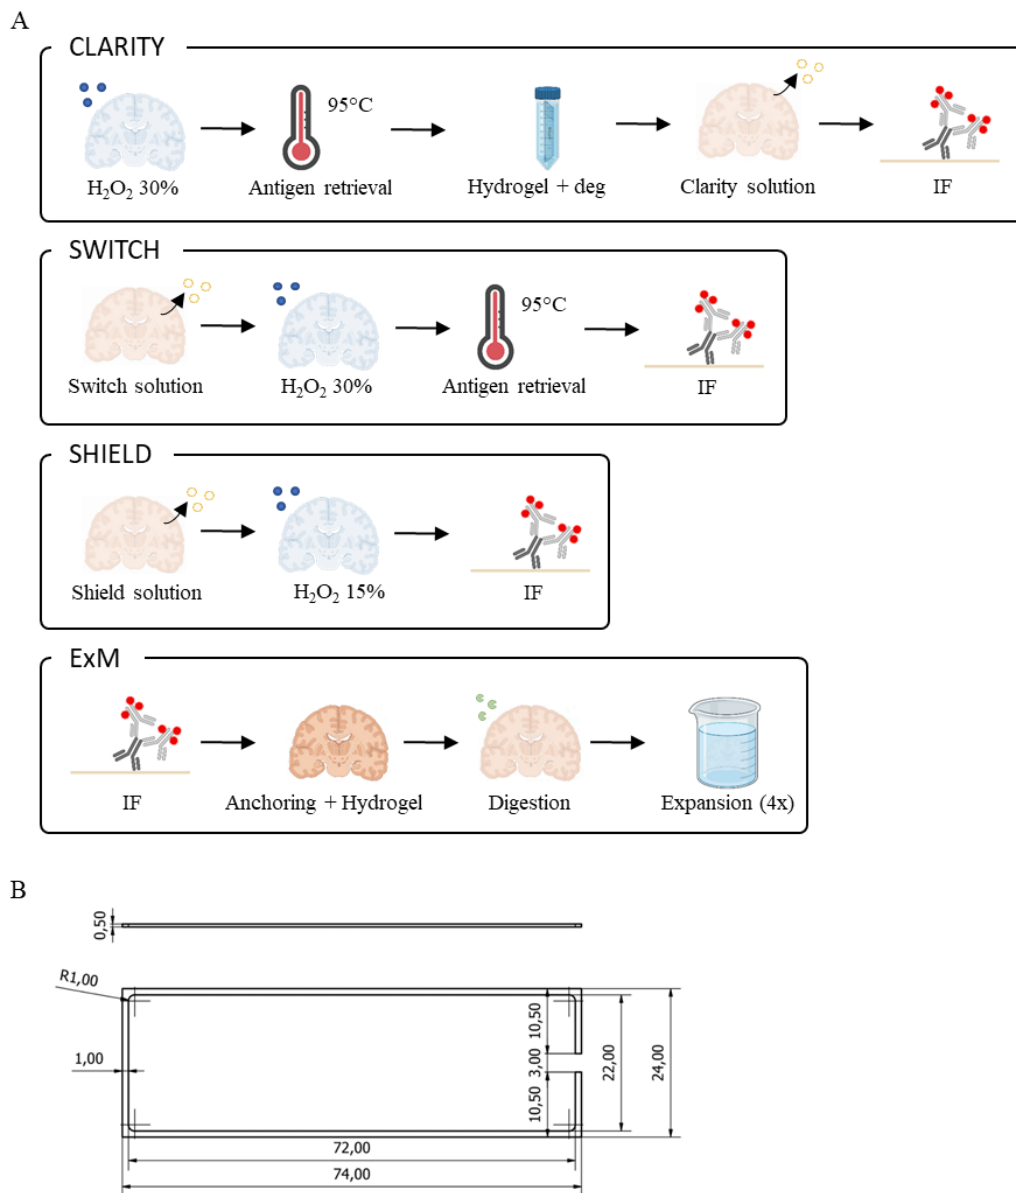

**Supplementary Figure 1.** (A) Schematic representations of the best protocols used for each clearing method. Created with BioRender.com. (B) Schematic drawing of the spacer used for assembling the sandwiches.

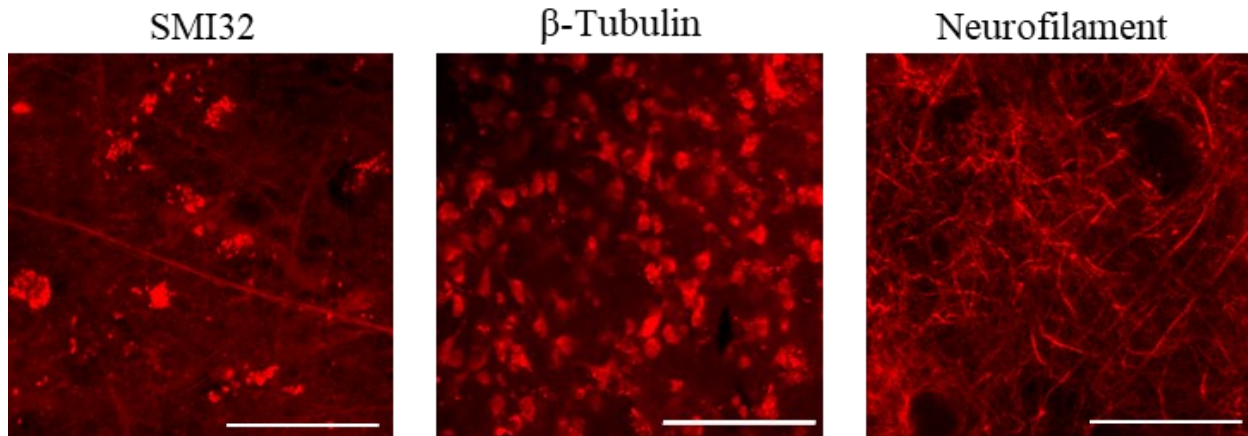

**Supplementary Figure 2.** Validation of the CLARITY meshgel in human brain slices. Immunofluorescent staining for additional neuronal markers of ( $\beta$ -Tubulin (center), and Neurofilament (right)) in CLARITY-processed human brain slices (area: superior frontal cortex). Excitation light 568 nm, laser power 1 mW. Objective lens 60x; NA 1.4. Scale bar, 50  $\mu$ m.

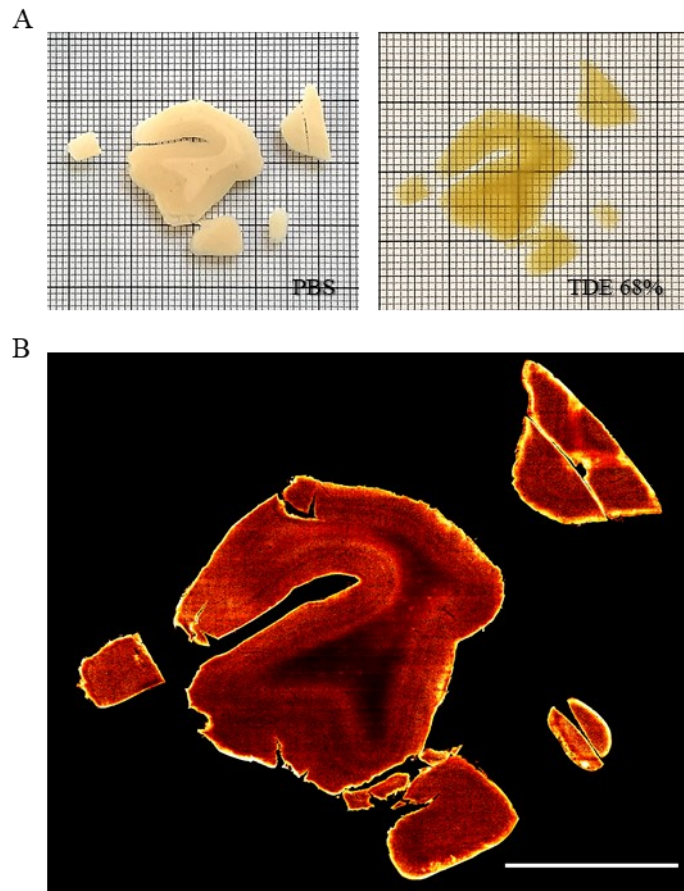

**Supplementary Figure 3.** Representative LSM Broca's area images. (A) Broca's area images of human brain slices in PBS (pre-clearing) and after refractive index matching in the 68% TDE/PBS solution. (B) SWITCH-processed slice stained with anti-NeuN antibody. MIP of 60  $\mu\text{m}$  at 150  $\mu\text{m}$  depth. Scale bar 1 cm.

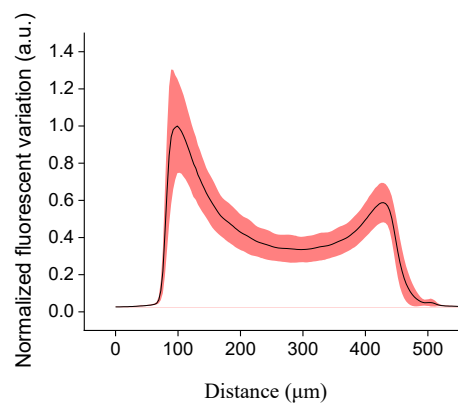

**Supplementary Figure 4.** Normalized plot intensity profiles of a representative stack from a  $4 \times 4 \times 0.048 \text{ cm}^2$  reconstruction of human brain slab (black line: mean; light-red outline: standard deviation).

## 1.2 Supplementary Tables

| Cat. N.    | Clarity | Switch | Shield |
|------------|---------|--------|--------|
| STJ113146  | No      | No     | No     |
| 26975-1-AP | No      | Yes    | Yes    |
| ARG52283   | No      | No     | No     |
| ARG10712   | No      | Yes    | yes    |
| ab104224   | No      | No     | No     |
| ABN78      | No      | No     | No     |
| ab207282   | No      | No     | No     |
| ab134014   | No      | No     | No     |
| ABN91      | No      | Yes    | yes    |
| D4G40      | No      | No     | No     |

**Supplementary Table 1.** Summary results of anti-NeuN labelling for each clearing method.
